# Inferring causality in biological oscillators

Jonathan Tyler,<sup>1,2</sup> Daniel Forger,<sup>1,3</sup> Jae Kyoung Kim<sup>4,5,\*</sup>

<sup>1</sup>Department of Mathematics, University of Michigan

<sup>2</sup>Division of Pediatric Hematology/Oncology, Department of Pediatrics  
University of Michigan

<sup>3</sup>Department of Computational Medicine and Bioinformatics, University of Michigan  
Ann Arbor, MI, 48109

<sup>4</sup>Department of Mathematical Sciences  
Korea Advanced Institute of Science and Technology, Daejeon, 34141, Republic of Korea

<sup>5</sup>Biomedical Mathematics Group  
Institute for Basic Science, Daejeon, 34126, Republic of Korea

\*To whom correspondence should be addressed; E-mail: [jaekkim@kaist.ac.kr](mailto:jaekkim@kaist.ac.kr)

**A fundamental goal of biological study is to identify regulatory interactions among components. The recent surge in time-series data collection in biology provides a unique opportunity to infer regulatory networks computationally. However, when the components oscillate, model-free inference methods, while easily implemented, struggle to distinguish periodic synchrony and causality. Alternatively, model-based methods test whether time series are reproducible with a specific model but require inefficient simulations and have limited applicability. Here, we develop an inference method based on a general model of molecular, neuronal, and ecological oscillatory systems that merges the advantages of both model-based and model-free methods, namely accuracy, broad applicability, and usability. Our method successfully infers the positive and negative regulations of various oscillatory networks, including the repressila-**

**tor and a network of cofactors of pS2 promoter, outperforming popular inference methods. We also provide a computational package, ION (Inferring Oscillatory Networks), that users can easily apply to noisy, oscillatory time series to decipher the mechanisms by which diverse systems generate oscillations.**

## Introduction

A fundamental goal in biology is to uncover the causal interactions among system components. To identify the casual interactions, conventional methods require experimental manipulation of one or more components to investigate the effect on others in the system. However, this approach is time-consuming and costly, particularly when the number of components in a system increases. On the other hand, thanks to recent technological advances (e.g., GFP, luciferase, microarray, etc.), measuring time-series data has become relatively easy. Accordingly, inferring direct regulations along with type (positive/negative) solely given time-series data is an important tool to provide key insights into the mechanisms underlying the system in a timely and inexpensive manner (*1*).

The unprecedented growth in the amount of biological data has revealed that biological processes frequently exhibit oscillatory behavior in time-series data, e.g., about half of the protein-coding genome is transcribed rhythmically (*2, 3*). To infer networks from oscillatory data, a popular model-free method, Granger Causality (GC) based on predictability, i.e.,  $X$  causes  $Y$  if  $X$  has unique information that can improve the prediction of  $Y$ , has been used (*4, 5*). However, as GC relies heavily on the assumption that the time-series data are stationary (*6*), it is challenging to apply GC to highly nonstationary oscillatory time-series data (*5, 7–9*). To overcome this limitation of GC, inference methods for dynamical systems, such as Convergent Cross Mapping (CCM), have been developed, based on a differing view of predictability, i.e.,  $X$  causes  $Y$  if historical values of  $X$  can be recovered from  $Y$  alone (*10–20*). Despite the

success of CCM methods in many biological applications, they frequently infer interactions between independent components when they oscillate with similar periods due to difficulty in distinguishing synchrony and casual interaction (21), indicating that these methods are likely to infer false-positive interactions in oscillatory networks. Nonetheless, these model-free methods remain widely used due to their ease of implementation and broad applicability to a large class of networks.

Alternatively, model-based methods were proposed that infer causality by determining whether time-series data are reproducible with mechanistic models. Testing the reproducibility requires computationally-expensive model simulations and fittings (22–35), but, as long as the underlying model is accurate, model-based methods do not suffer from false positive predictions unlike model-free methods. However, the inference results strongly depend on the choice of model, which is frequently based on limited information. Thus, inference methods using more general ODE forms were developed (36–45). For example, previously, we developed a method that infers causation from  $X$  to  $Y$  by checking whether oscillatory time-series data for  $X$  and  $Y$  are reproducible with a common ODE model for biological oscillators:  $\frac{dY}{dt} = f(X) - g(Y)$ , where  $f$  and  $g$  describe the synthesis and degradation rates of  $Y$ , respectively (41). Pigolotti et al. (36) considered the most general possible mechanistic model between two components:

$$\frac{dY}{dt} = f(X, Y). \quad (1)$$

However, unlike (41), this method uses only the minima and maxima rather than all of the time-series data (36). Thus, the method requires the restrictive assumption that all given components are in a single negative feedback loop (i.e., the method determines the order of given components in a feedback loop). Moreover, extensions of the method (37, 38) require that a single negative feedback loop structure drive the dynamics, limiting their applicability.

Here, we develop an inference method for biological oscillators described by Eqn. (1) that

merges the advantages of model-based and model-free methods, namely usability, broad applicability, and accuracy, while mitigating the drawbacks of each. Specifically, we identify a fundamental relationship between the general model (Eqn. (1)) and its oscillatory solution. By using this relationship, we develop a simple functional transformation (i.e., regulation-detection function) of a pair of oscillatory time-series data that easily tests whether the time-series data are reproducible with the general model. This transformation enables accurate and precise inference of the (self-)regulation type (e.g., positive, negative, or a mixture) between two components  $X$  and  $Y$  described by Eqn. (1). This allows us to infer various network structures such as a cycle, multiple cycles, and a cycle with outputs from *in silico* oscillatory time-series data. Furthermore, our method also successfully infers regulation types from noisy experimental data measured at the molecular and organismal levels. In particular, from time-series data of the repressilator and cofactors at the pS2 promoter, our method infers networks that match current biological knowledge while popular model-free methods incorrectly infer nearly fully connected networks. Importantly, we provide a user-friendly computational package (ION: Inferring Oscillatory Networks) that implements our method to infer network structures of biological oscillators, which requires minimal user effort.

## Results

### Inferring regulation types from oscillatory time series

In the reduced FitzHugh-Nagumo model (Fig. 1A) (46), which describes the interactions between the membrane potential of a neuron ( $V$ ) and the accommodation and refractoriness of the membrane ( $W$ ) (46, 47),  $W$  positively regulates  $V$  while  $V$  negatively regulates  $W$ . In addition,  $V$  displays a mixture of positive and negative self-regulation while  $W$  negatively regulates itself.

How are such inter- and self-regulations reflected in the oscillatory change of  $V$  and  $W$

simulated with the model (Fig. 1B)? The change in  $V$  and  $W$  does not directly reflect their regulatory interactions. For instance, although  $W$  positively regulates  $V$ , when  $W$  increases,  $V$  does not always increase (e.g., in the region highlighted in yellow, Fig. 1B). This is because  $W$  positively regulates  $\dot{V}$  rather than the value of  $V$  (Fig. 1A). However, the relationship between the change in  $W$  and  $\dot{V}$  also does not reflect the positive regulation of  $W$  on  $V$ . For example, in the yellow region (Fig. 1B),  $\dot{V}$  decreases despite increasing  $W$ , which happens because the self-regulation of  $V$  on  $\dot{V}$  masks the effect of  $W$  on  $\dot{V}$ . Thus, to infer the effect of  $W$  on  $\dot{V}$  independently of  $V$ , we investigate the relationship between  $W$  and  $\dot{V}$  at the pair of time points  $t$  and the *reflection time*,  $t_V$ , where  $V(t) = V(t_V)$  (Fig. 1B). As  $V(t) = V(t_V)$ , the difference in  $\dot{V}(t) = f(V(t), W(t))$  and  $\dot{V}(t_V) = f(V(t_V), W(t_V))$  is solely determined by the difference between  $W(t)$  and  $W(t_V)$ . Thus, because  $W$  positively regulates  $V$  (Fig. 1A), if  $W(t)$  is greater (less) than  $W(t_V)$ ,  $\dot{V}(t)$  should be greater (less) than  $\dot{V}(t_V)$ . Similarly, to infer the type of self-regulation of  $V$ , we must remove the variation of  $\dot{V}$  due to  $W$  that masks the effect of  $V$  on  $\dot{V}$ . Thus, we investigate the relationship between  $V$  and  $\dot{V}$  at the pair of time points  $t$  and the reflection time,  $t_W$ , where  $W(t) = W(t_W)$  (Fig. 1B). To quantify such relationships between  $W$  and  $\dot{V}$  and  $V$  and  $\dot{V}$ , we develop the *regulation-detection functions*:

$$\begin{aligned} R_{W \rightarrow V}^{t_V}(t) &:= (W(t) - W(t_V)) \cdot (\dot{V}(t) - \dot{V}(t_V)) \\ &:= W_d^{t_V}(t) \cdot \dot{V}_d^{t_V}(t), \end{aligned} \quad (2)$$

and

$$\begin{aligned} R_{V \rightarrow V}^{t_W}(t) &:= (V(t) - V(t_W)) \cdot (\dot{V}(t) - \dot{V}(t_W)) \\ &:= V_d^{t_W}(t) \cdot \dot{V}_d^{t_W}(t). \end{aligned} \quad (3)$$

As  $W$  positively regulates  $V$ , the functions  $W_d^{t_V}$  and  $\dot{V}_d^{t_V}$  should have the same sign and thus,  $R_{W \rightarrow V}^{t_V}(t) \geq 0$  throughout the cycle (Fig. 1C, left). That is, if  $W_d^{t_V} = W(t) - W(t_V) \geq 0$ , then  $\dot{V}_d^{t_V} = \dot{V}(t) - \dot{V}(t_V) = 3(W(t) - W(t_V)) \geq 0$  (Fig. 1A). On the other hand, due to the mixture of positive and negative self-regulation of  $V$ , the relationship between the signs of  $V_d^{t_W}(t)$  and  $\dot{V}_d^{t_W}(t)$ , and thus the sign of  $R_{V \rightarrow V}^{t_W}(t)$ , varies throughout the cycle (Fig. 1C, right).

As the profiles of the sign of the regulation-detection functions (Eqns. (2) and (3)) reflect the regulation type, we develop a *regulation-detection score* that quantifies the variation in the sign of the regulation-detection functions. For instance, the regulation-detection score for the regulation of  $W$  on  $V$  is defined as

$$\begin{aligned} \langle R_{W \rightarrow V} \rangle &:= \frac{\int_0^\tau R_{W \rightarrow V}^{tV}(t) dt}{\int_0^\tau |R_{W \rightarrow V}^{tV}(t)| dt} \\ &= \frac{\text{Positive Area}}{\text{Total Area}} - \frac{\text{Negative Area}}{\text{Total Area}}, \end{aligned} \quad (4)$$

where  $\tau$  is the period (e.g.,  $\tau = 1$  in Fig. 1C, left). The regulation-detection score  $\langle R_{W \rightarrow V} \rangle = 1$  because  $W$  positively regulates  $V$ , and thus  $R_{W \rightarrow V}^{tV}(t) \geq 0$  (i.e., the negative area is zero) (Fig. 1C, left). On the other hand, because  $V$  both positively and negatively regulates itself,  $R_{V \rightarrow V}^{tW}(t)$  takes both positive and negative values, so  $\langle R_{V \rightarrow V} \rangle = 0.6 - 0.4 = 0.2$  (Fig. 1C, right).

Similarly, we can obtain information about the regulation of  $V$  on  $W$  and the self regulation of  $W$  with the regulation-detection functions  $R_{V \rightarrow W}^{tW} := V_d^{tW} \cdot \dot{W}_d^{tW}(t)$  (Fig. 1D, left) and  $R_{W \rightarrow W}^{tV} := W_d^{tV} \cdot \dot{W}_d^{tV}(t)$  (Fig. 1D, right). Because  $V$  negatively regulates  $W$ ,  $R_{V \rightarrow W}^{tW}(t) \leq 0$ . Also, because the self-regulation of  $W$  is purely negative,  $R_{W \rightarrow W}^{tV}(t) \leq 0$ . Thus,  $\langle R_{V \rightarrow W} \rangle = -1$ , and  $\langle R_{W \rightarrow W} \rangle = -1$  (Fig. 1D). Taken together, in general, if  $X$  positively (negatively) regulates  $Y$ , then  $\langle R_{X \rightarrow Y} \rangle = 1$  ( $\langle R_{X \rightarrow Y} \rangle = -1$ ) (see Theorem 1 in Supplementary Information).

Next, we calculated the regulation-detection scores from experimentally measured oscillatory time-series data of two bacteria: *Paramecium* and *Didinium*, which we refer to as P and D (Fig. 1E), respectively (48). As P is a prey of the predator D (48), D is expected to negatively regulate P, and P is expected to positively regulate D. Reflecting this,  $\langle R_{P \rightarrow D} \rangle = 1$  and  $\langle R_{D \rightarrow P} \rangle = -1$  (Fig. 1E). Furthermore, reflecting the positive (i.e., birth) and negative (i.e., death) self-regulation of both P and D,  $\langle R_{D \rightarrow D} \rangle = 0.51 - 0.49 = 0.02$  and  $\langle R_{P \rightarrow P} \rangle = 0.63 - 0.37 = 0.26$  (Fig. 1E). The regulation-detection scores appear to accurately reflect types of regulation even for noisy and discrete time-series data.

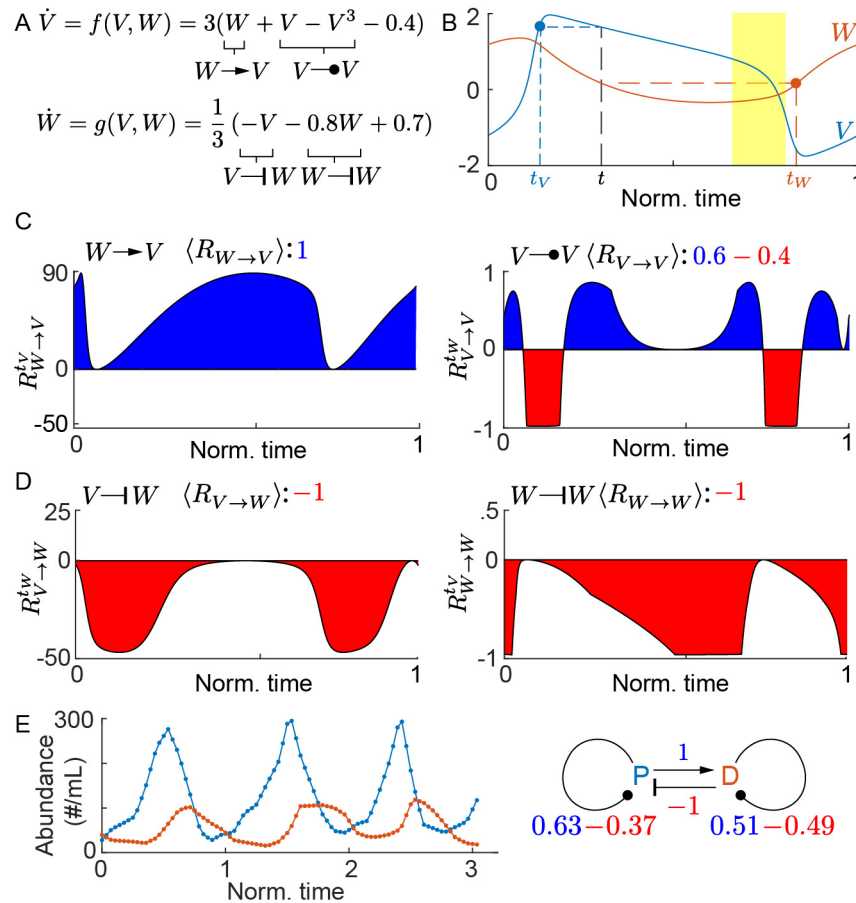

Figure 1: **Regulation-detection functions and scores reflect regulation types.** (A) The FitzHugh-Nagumo model describes the interactions between the membrane potential of a neuron ( $V$ ) and the accommodation and refractoriness of the membrane ( $W$ ).  $W$  positively regulates  $V$  while  $V$  negatively regulates  $W$ . In addition,  $V$  displays a mixture of positive and negative self-regulation while  $W$  negatively regulates itself. (B) Time series of one cycle simulated with the FitzHugh-Nagumo model. Although  $W$  positively regulates  $V$  (i.e.,  $\dot{V}$  positively depends on  $W$ ),  $\dot{V}$  decreases despite increasing  $W$  (yellow region) because the self-regulation of  $V$  on  $\dot{V}$  masks the effect of  $W$  on  $\dot{V}$ . On the other hand, for the pair of time points  $t$  and reflection time  $t_V$ , where  $V(t) = V(t_V)$ , if  $W(t)$  is greater (less) than  $W(t_V)$ , then  $\dot{V}(t)$  should be greater (less) than  $\dot{V}(t_V)$ . Similarly, as  $V$  negatively regulates  $W$ , if  $V(t)$  is greater (less) than  $V(t_W)$ , then  $\dot{W}(t)$  should be less (greater) than  $\dot{W}(t_W)$  for the pair of time points  $t$  and  $t_W$ , where  $W(t) = W(t_W)$ . (C) The regulation-detection function  $R_{W \rightarrow V}^{t_V}$  (Eqn. (2)) is positive, and thus the regulation-detection score  $\langle R_{W \rightarrow V} \rangle$  (Eqn. (4)) equals one, reflecting the positive regulation of  $W$  on  $V$ . The sign of  $R_{V \rightarrow V}^{t_V}(t)$  (Eqn. (3)) changes, and thus  $-1 < \langle R_{V \rightarrow V} \rangle < 1$  (Eqn. (4)), reflecting the mixture of positive and negative self-regulation of  $V$ . (D) Both  $R_{V \rightarrow W}^{t_W}$  and  $R_{W \rightarrow W}^{t_W}$  are negative, and thus  $\langle R_{V \rightarrow W} \rangle = \langle R_{W \rightarrow W} \rangle = -1$ , reflecting the negative regulation of  $V$  on  $W$  and the self-regulation of  $W$ . (E) Regulation-detection scores are calculated

from the time-series population data of two bacteria: *Paramecium*, P (blue), and *Didinium*, D (red) (data taken from (10)). Reflecting the known predatory interaction,  $\langle R_{P \rightarrow D} \rangle = 1$  and  $\langle R_{D \rightarrow P} \rangle = -1$ . Furthermore, reflecting that the self-regulation of both P and D consists of both positive (i.e., birth) and negative (i.e., death) regulation,  $\langle R_{P \rightarrow P} \rangle = 0.26$  and  $\langle R_{D \rightarrow D} \rangle = 0.02$ .

## Network Inference method from oscillatory time series

If  $X$  positively (negatively) regulates  $Y$ , then the reflection score  $\langle R_{X \rightarrow Y} \rangle = 1$  (resp.,  $-1$ ). In other words,  $-1 < \langle R_{X \rightarrow Y} \rangle < 1$  indicates either a mixture of positive and negative regulation of  $X$  to  $Y$  or the absence of regulation. Thus, in the system where the interactions are not mixed (i.e., monotonic), such as gene regulation by a transcription factor and predator-prey relationships,  $-1 < \langle R_{X \rightarrow Y} \rangle < 1$  indicates the absence of regulation. This can be used to infer network regulations from time-series data, as positive or negative regulation is present in the network only when  $\langle R_{X \rightarrow Y} \rangle = 1$  or  $-1$ , respectively. Similarly, self-regulation, which is either positive or negative, is possible only when  $\langle R_{Y \rightarrow Y} \rangle = 1$  or  $-1$ . However, since the degradation of molecules or the death rate of species typically increases as its own concentration increases, self-regulation can be assumed to be negative (i.e.,  $\langle R_{Y \rightarrow Y} \rangle = -1$ ). In this case, positive or negative regulation from  $X$  to  $Y$  is possible only when  $\vec{R} = (\langle R_{X \rightarrow Y} \rangle, \langle R_{Y \rightarrow Y} \rangle) = (1, -1)$  or  $(-1, -1)$ , and thus,  $\vec{R} \neq (\pm 1, -1)$  indicates the absence of regulation (Rule 1, Fig. 2A). Furthermore, we use  $\vec{R} = (1, -1)$  or  $(-1, -1)$  to infer positive or negative regulation (Rules 2 and 3, Fig. 2A). Note that, if positive or mixed self-regulation is possible, as in Fig. 1E, Rules 2 and 3 can be relaxed to  $\langle R_{X \rightarrow Y} \rangle = 1$  and  $\langle R_{X \rightarrow Y} \rangle = -1$ , respectively.

We illustrate how the three rules (Fig. 2A) can infer a network using as an example the Kim-Forger model (Fig. 2B), a simple model describing the transcriptional negative feedback loop of the mammalian circadian clock (49, 50). In the model, the mRNA ( $M$ ) is translated into the cytosolic protein ( $P_C$ ). Then,  $P_C$  is transported to the nucleus and there  $P$  inhibits the transcription of  $M$  (49, 50). To infer the network structure (Fig. 2B, bottom), we first compute  $\vec{R}$



for each possible interaction and self-regulation pair (six in total) from the time series (Fig. 2B, top). Then, using Rule 1, three regulations are inferred as absent (Fig. 2B). Furthermore, Rules 2 and 3 successfully identify the two positive regulations ( $M \rightarrow P_C$  and  $P_C \rightarrow P$ ) and the one negative regulation ( $P \dashv M$ ), which have  $\vec{R} = (1, -1)$  and  $\vec{R} = (-1, -1)$ , respectively. This successfully infers the negative feedback loop structure (Fig. 2B). Using the same procedure, our method also successfully infers the *Frz* regulator negative feedback loop, which models the signaling circuit of *Myxococcus xanthus* (51) (Fig. 2C and Table S1) and a 4-state Goodwin oscillator (52) (Fig. 2D and Table S2).

In fact, for the single negative feedback loop models, the order of peaks and nadirs of the time series matches with the order of regulation in the feedback loop (Fig. 2B-D). For instance, the peak of  $M$  is followed by the peaks of  $P_C$  and then  $P$  (Fig. 2B). This property has been used in previous algorithms to infer single negative feedback loop structures (36–38). Next, we test whether our method can be applied to a more challenging case when data are merged from two independent models, specifically the Kim-Forger (Fig. 2E; solid lines) and Goodwin (Fig. 2E; dashed lines) models. After merging the time-series data, the order of peaks and nadirs cannot be used to infer the network anymore. That is, if only the order of peaks is used for this example, a single negative feedback loop with seven components is inferred. However, as our method uses the whole data set rather than just the peaks and nadirs, it successfully infers the two independent underlying networks (Fig. 2E, right and Table S3). Moreover, our inference method also successfully infers a cyclic network with output variables, which also does not adhere to the single feedback loop structure (Fig. 2F and Table S4).

While our method successfully infers various networks, Rules 2 and 3 can make false-positive inferences as  $\vec{R} = (\pm 1, -1)$  is a necessary condition for positive or negative regulation, and thus  $\vec{R} = (\pm 1, -1)$  can occur even in the absence of regulation. We illustrate this using a simulated repressilator data set (Fig. 2G, left). The repressilator is a single feed-

back loop of genetic inhibition that consists of three mRNA (Fig. 2G, left; solid lines) and three proteins (Fig. 2G, left; dashed lines) (53, 54). The mRNA ( $M_i$ ) are translated into the respective proteins ( $P_i$ ), which then repress the transcription of the next gene (e.g.,  $P_1$  represses  $M_2$ ). While our method recovers the correct interactions (Fig. 2G, right; solid arrows), it also incorrectly predicts negative regulation among the proteins (Fig. 2G, right; dashed arrows). These false-positive predictions are due to the similar shape and phase of the time-series data. For instance, the shape and phase of  $P_1$  (solid blue line) is extremely close to the shape and phase of its mRNA,  $M_1$  (dashed blue line), e.g., their phase difference is only 2.4% of the total period. Due to their similarity, our method cannot distinguish  $M_1$  and  $P_1$  and thus predicts that  $P_3$  negatively regulates not only  $M_1$  but also  $P_1$ . For the same reason, our method falsely predicts that  $P_1$  negatively regulates  $P_2$ , and  $P_2$  negatively regulates  $P_3$  (Fig. 2G and Table S5). Taken together, we caution that, in the presence of nearly identical time series in a network, our method may infer false-positive regulations, which seems unavoidable for any inference methods using time-series data.

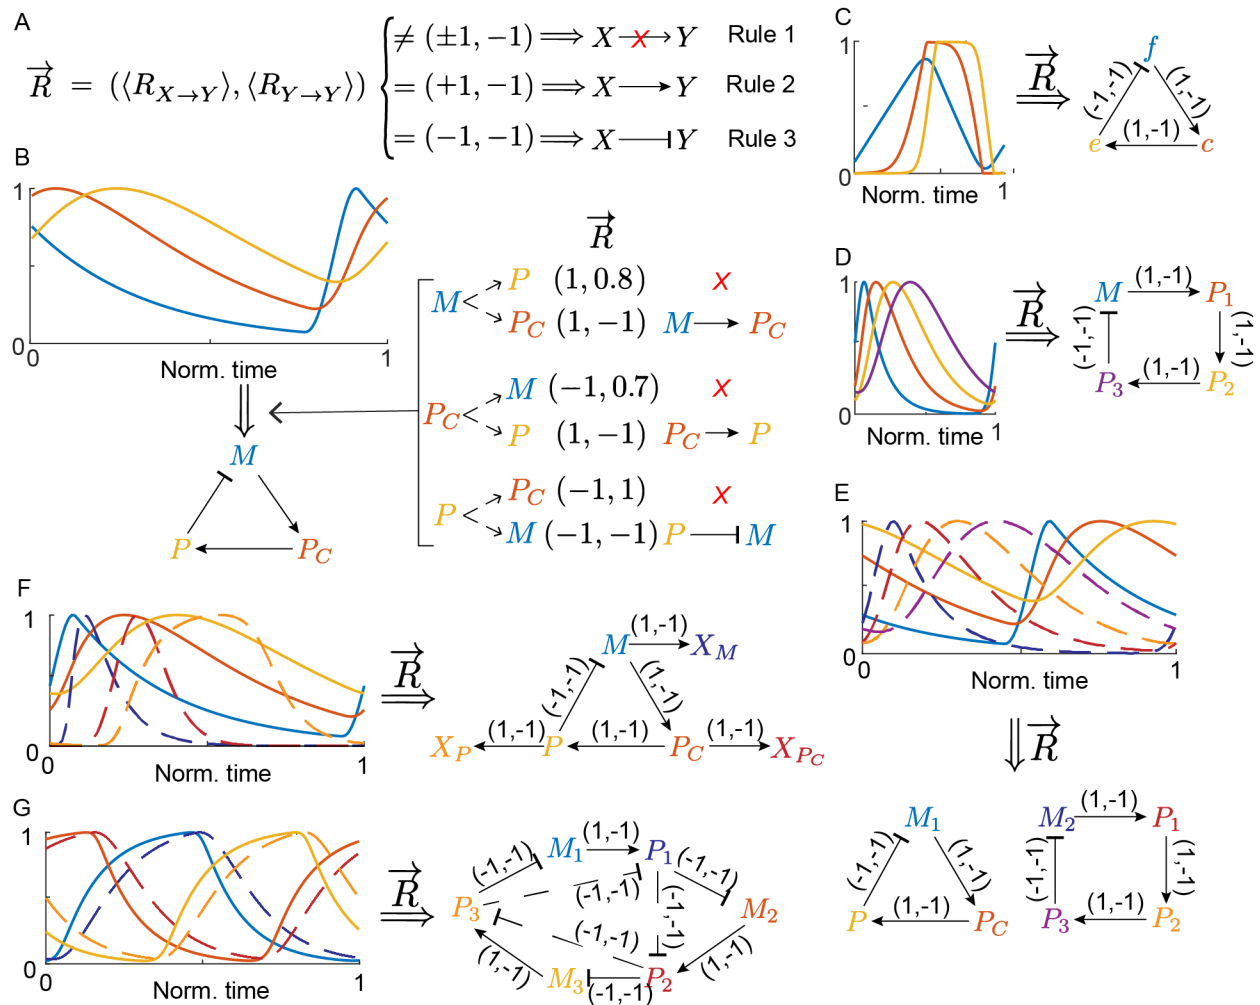

**Figure 2: The inference method successfully infers various *in silico* network structures.** (A) The three rules for network inference.  $\vec{R} \neq (\pm 1, -1)$  indicates the absence of regulation and  $\vec{R} = (1, -1)$  or  $(-1, -1)$  indicates positive or negative regulation. (B) The three rules successfully infer the network structure of the Kim-Forger model from simulated time-series data. According to Rule 1, the three regulations  $M \rightarrow P$ ,  $P_C \rightarrow M$ , and  $P \rightarrow P_C$  are inferred as absent. According to Rules 2 and 3, the two positive regulations ( $M \rightarrow P_C$  and  $P_C \rightarrow P$ ) and the one negative regulation ( $P \dashv M$ ), which have  $\vec{R} = (1, -1)$  and  $\vec{R} = (-1, -1)$ , are inferred. (C-D) Our inference method also successfully infers the negative feedback loop of the *Frz*ilator (C) and a 4-state Goodwin oscillator (D). (E-F) Our inference method also successfully infers correct regulations for more challenging cases beyond the single feedback loop structure, i.e., when time-series data are simulated with two independent models, the Kim-Forger model and Goodwin model (E) and an extended Kim-Forger model with output variables (F). (G) Our method also successfully infers regulations (solid arrows) of the repressilator from its three mRNA (solid lines) and three protein time-series data (dashed lines). However, our

method also falsely predicts negative regulations among the proteins (dashed arrows) due to the similar time series between an mRNA and its protein (e.g.,  $M_1$  and  $P_1$ ). See Tables S1-S5 for the complete list of regulation-detection scores for (C)-(G) and Section 3 in Supplementary Information for the equations and parameters used to simulate the data.

## Robustness of the inference method to interpolation error and noise

The calculation of  $\vec{R}$ , which is the key to the inference method, requires continuous time-series data. Typically, however, experimentally measured time-series data are sampled discretely. For instance, mRNA levels of circadian genes frequently are measured via PCR every three hours (55). For discrete data, our method uses interpolation to generate continuous data (see Methods). Accordingly, we test how sensitive our method is to interpolation error, specifically when linear interpolation is used, by using the five *in silico* data sets in Figs. 2B-F. That is, by decreasing the points measured per period from  $10^2$  to  $10^1$  (i.e., increasing the interpolation error), we quantify the accuracy of our network inference method with the score  $F_1 = \frac{TP}{TP + (FP + FN)/2}$  (TP-the number of true positives, FP-false positives, and FN-false negatives). As  $F_1$  is the harmonic mean of precision and recall,  $F_1 = 1$  and  $F_1 = 0$  indicate perfect recovery of the network and absence of correct inference, respectively. To account for interpolation error, we accept interactions based on three thresholds for  $\langle R \rangle$  values: 0.99, 0.95, and 0.90. For example, a threshold of 0.99 means that we relax the condition  $\vec{R} = (\pm 1, -1)$  up to  $\pm 0.99$ , i.e, we accept any interaction that satisfies both  $|\langle R_{X \rightarrow Y} \rangle| > 0.99$  and  $\langle R_{Y \rightarrow Y} \rangle < -0.99$ . We repeat this process 100 times, each time beginning the sample collection at a randomly selected time in the period (see Methods for details). Then, we investigate how the mean of the distribution of  $F_1$  scores changes as the sampling rate decreases (Fig. 3A). For single negative feedback loops (i.e., Frzillator, Goodwin, Kim-Forger), our method accurately recovers the network even when the number of data points measured per period is relatively low, e.g., ten per cycle. For the more complicated models (i.e., the merged Goodwin

and Kim-Forger and the Kim-Forger with outputs models), slightly more data points are required for inference at high accuracy. Furthermore, our method shows similar robustness across the three thresholds, especially when the points sampled are toward the lower end.

Next, because experimental data includes noise, we test the sensitivity of our network inference procedure to noise (Fig. 3B) (see Methods for details). As we increase the level of the multiplicative noise added to the data set from 0 (no noise) to 10% multiplicative noise (sampled from  $N(0, 0.1^2)$ ), the  $F_1$  scores decrease. In particular, the decrease occurs more dramatically when the threshold is 0.99, indicating that the high threshold leads to higher sensitivity to noise in the data. Moreover, this decrease in  $F_1$  scores with the threshold of 0.99 is a result of an increase in false negatives (i.e., the exclusion of true interactions due to noise). Thus, we use a threshold of 0.9 when applying our inference method to experimental data (see below) as it leads to the most accurate results in the presence of noise (Fig. 3B). However, users have the option to adjust the threshold depending on the sampling rate and noise level of the data when using our computational package, ION (see Supplementary Information and Figs. S1 and S2 for a step-by-step manual).

### **Successful inferences from experimentally measured time series**

As our inference method is quite robust to discrete data sampling and noise, we expect that our inference method can accurately infer network structures from experimentally measured time series as well. Indeed, when applied to experimentally measured abundances of the three repressilator proteins (54), our method successfully infers a three-gene repressilator network structure (Fig. 4A and Table S6). Note that our method recovers the repressilator network despite the absence of mRNA data because the shape and phase of the mRNA and protein profiles are expected to be similar, as in Fig. 2G, due to the short translation time in *E. coli* compared to the period (56). Moreover, we compare the results of our method with those of

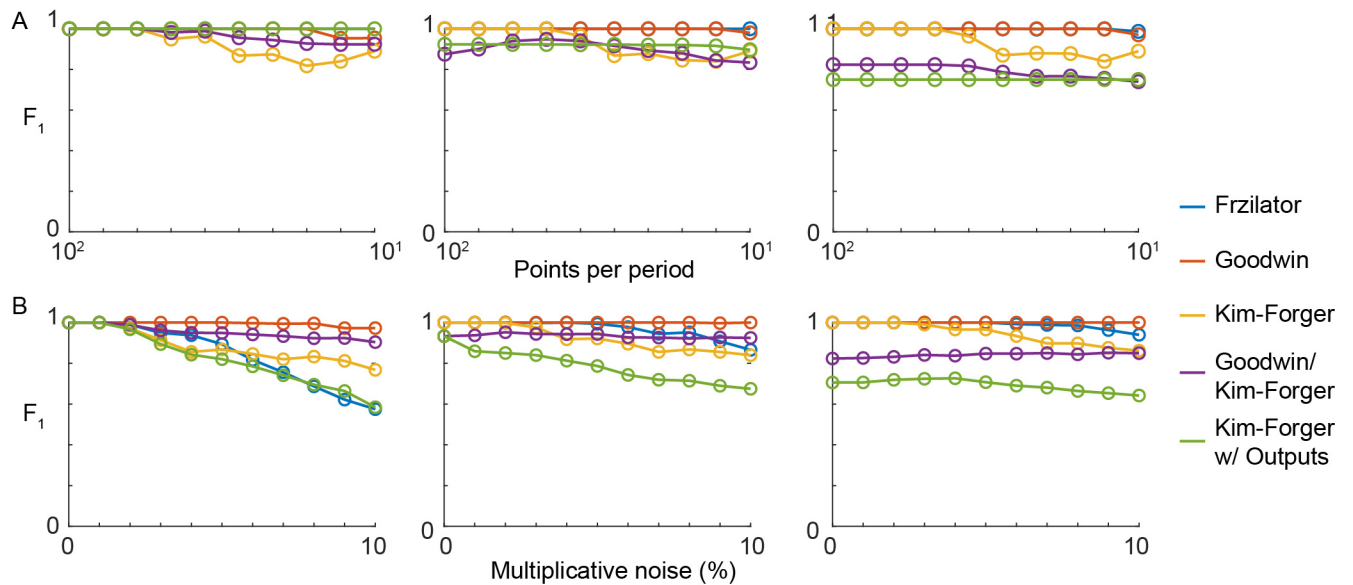

**Figure 3: Our network inference method is robust to interpolation error and to noise.** (A-B) The accuracy of our inference method when the number of points measured (A) and the level of noise (B) vary. Here, the points measured per period decreases from  $10^2$  to  $10^1$  (A) and the multiplicative noise increases from 0 to 10%, which is sampled from  $N(0, 0.1^2)$  (B). The mean of the  $F_1$  score for 100 different time series, which are generated with randomly chosen phases (A) and noise levels (B), is plotted (see Methods for details).  $F_1 = 1$  and 0 indicate perfect recovery of the network and the absence of correct inference, respectively. Different thresholds for  $\langle R \rangle$ , 0.99 (left), 0.95 (middle), and 0.90 (right), are used.

two popular model-free inference methods, Partial Cross Mapping (PCM) (20) and Granger Causality (GC) (4) (Fig. 4A). As these methods can only infer the presence of regulation, not its type (i.e., positive and negative), unlike our method, the arrows represent inferred regulations, which could be either positive or negative. The PCM method recovers two correct regulations,  $P_2 \rightarrow P_1$  and  $P_3 \rightarrow P_2$ , but fails to recover the regulation  $P_1 \rightarrow P_3$  and makes two false-positive predictions,  $P_1 \rightarrow P_2$  and  $P_3 \rightarrow P_1$ . While the GC method infers all existing regulations, it makes two additional false-positive predictions,  $P_1 \rightarrow P_2$  and  $P_2 \rightarrow P_3$ . Even for this simple three-node network, the popular model-free inference methods make false-positive predictions because the network components oscillate at the same period.

We compare the performance of our method with these model free-inference methods for a more challenging case when we combine two copies of the data set in Fig. 4A, one at the original phase and one with shifted phase (Fig. 4B and Table S7). From the combined time-series data, our method successfully infers two repressilator networks, whereas the PCM method infers two of the six correct regulations while also inferring four incorrect regulations (Fig. 4B). The GC method infers more correct regulations (five of the six); however, again, it suffers from several spurious regulations (15 false-positive interactions, Fig. 4B). Note that, even though we are using the same repressilator data set, there are inconsistencies in the PCM and GC results compared with those from Fig. 4A. These inconsistencies are a consequence of the shortened length of data used in Fig. 4B compared with that in Fig. 4A. This indicates that, in addition to the risk of false-positive inference, the PCM and GC methods are sensitive to the amount of data, unlike ours.

For time series measuring the amount of cofactors present at the estrogen-sensitive pS2 promoter after treatment with estradiol (data from (57, 58)), PCM and GC infer an almost fully connected network and a fully connected network, respectively. On the other hand, our method only infers two regulations, both supported by the current biological understanding of the sys-

tem. That is, human ER $\alpha$  (hER) binds to the pS2 promoter after treatment with estradiol to recruit RNA Polymerase II to the promoter, supporting the inferred positive regulation of POLII by hER. Furthermore, TRIP1 acts as a surrogate measure for the 20S proteasome (APIS), which promotes proteasome-mediated degradation of hER (57), supporting the inferred negative regulation of hER by TRIP1. However, the inferred network (Fig. 4C) does not contain a negative feedback loop, which is required to generate sustained oscillations (59). Thus, there may be intermediate steps between POLII and TRIP1, TRIP1 and HDAC, and also HDAC and hER that form the negative feedback loop. Altogether, this illustrates that our method can identify direct regulations while highlighting connections that require further experimental investigation.

## Discussion

We developed a model-based method that infers the network structure underlying biological oscillators. The method identifies positive or negative regulation by testing whether given oscillatory time-series data are reproducible with a general mechanistic ODE model (Eqn. (1)). In this way, our method successfully and efficiently inferred several network architectures such as single cycles (e.g., repressilator), two independent cycles, and a cycle structure with outputs. Furthermore, we provide a user-friendly computational package, ION, that applies to discrete and noisy data to infer networks of biological components that oscillate from the molecular to the population level. Our method can uncover unknown functional relationships and mechanisms that drive oscillatory behavior in biological systems when it is incorporated with evolving experimental time-series measurement methods.

Our method merges the advantages of model-based and model-free methods while mitigating the drawbacks of each. In particular, our model-based inference method does not suffer from the serious risk of false-positive prediction for biological oscillators or sensitivity to the amount of data unlike the previous model-free inference methods such as GC and PCM (Fig.



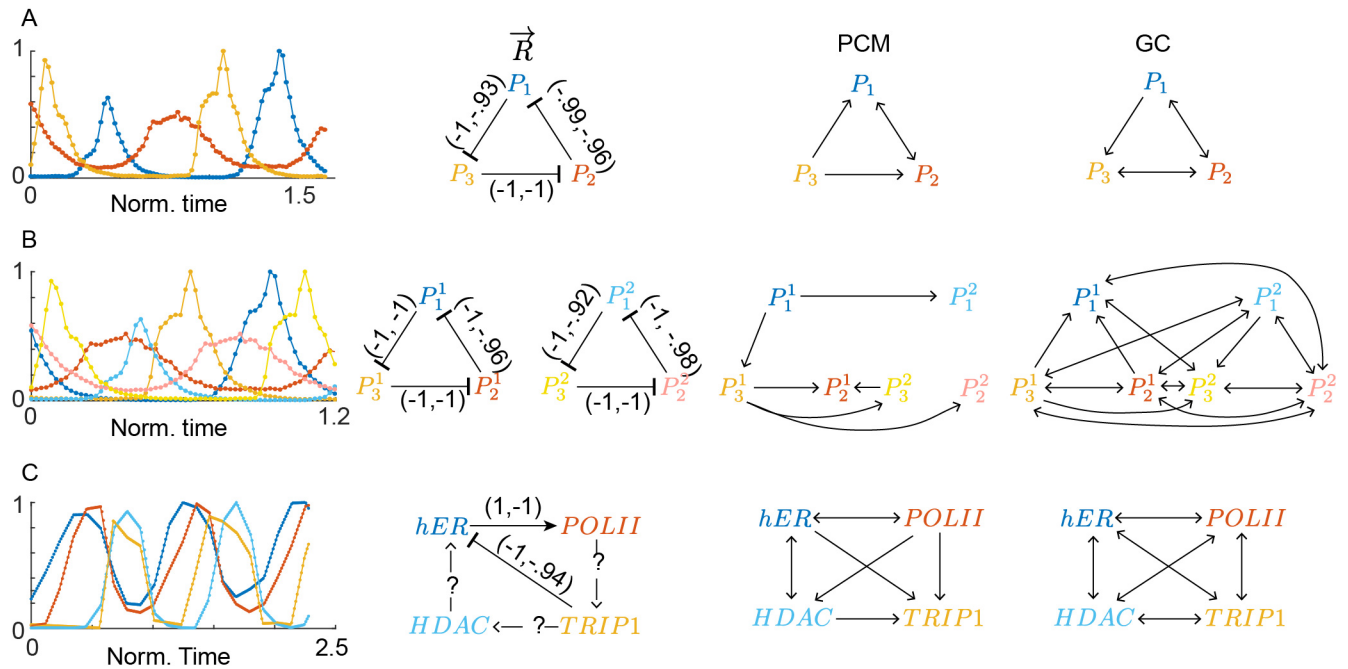

**Figure 4: The inference method successfully infers networks from three experimental data sets.** (A) Using experimentally measured oscillatory time series from (54), our method successfully infers a three-gene repressilator network structure. On the other hand, two popular model-free inference methods, PCM and GC, infer several false-positive regulations (e.g.,  $P_1$  regulates  $P_2$ ). (B) Our method also successfully infers the structure when the experimental repressilator data set from (A) is duplicated and the phase is shifted by about half of the period. However, again, both the PCM and GC methods exhibit several false-positive predictions and the inferred networks lose the independent cycle structure. (C) When our method is applied to a data set measuring the amount of cofactors at the estrogen-sensitive pS2 promoter after treatment with  $E_2$  (57), it infers two direct regulations: hER positively regulates POLII, and TRIP1 negatively regulates hER. On the other hand, PCM and GC infer nearly fully connected networks, including interactions that are not supported by the current experimental understanding. See Tables S6-S8 for the complete list of regulation-detection scores.

4). However, as our inference method is model-based, it runs the risk that the imposed ODE model and functional relationships create false representations of the true interactions (21). Our method minimizes this risk by using the most general form of an ODE (Eqn. (1)) to model the change in a component that is acted upon by another component and itself. In this way, we resolve the limitations of previous model-based methods that restricted the class of models, such as separable synthesis and degradation functions (39, 41, 45), specific types of functions (e.g., power or Hill functions) (31, 39), and a single negative feedback loop structure (36–38). Thus, we were able to uncover several varying network structures. While we considered the most general form of an ODE (Eqn. (1)) that describes the interactions between two components, an interesting future direction would be to extend our work to models that describe the interactions among multiple oscillatory components, e.g.,  $\frac{dY}{dt} = f(X_1, \dots, X_n, Y)$ .

## Methods

### ION (Inferring Oscillatory Networks) computational package

We provide user-friendly MATLAB code (a Github repository link will be provided upon acceptance of the manuscript). The ION package can be used to infer the network structure of oscillators, which are described by Eqn. (1), across all levels of biology. Here, we briefly describe the key steps of the ION package (see Supplementary Information for a comprehensive manual).

#### Reflection times

For each time point  $t_i$  of the given time series  $X(t) = (X(t_1), X(t_2), \dots, X(t_n))$ , first, the reflection time  $t_{iX}$  needs to be calculated (Fig. 1B). That is, we seek the time point  $t_{iX}$  such that  $X(t_i) = X(t_{iX})$  and the signs of the slopes at  $X(t_i)$  and  $X(t_{iX})$  are opposite (i.e., rising and falling phase). For this, the discrete  $X(t)$  is interpolated to a continuous time series  $F_X(t)$  with

either the ‘linear’ or ‘fourier’ interpolation method, chosen by the user. Then,  $t_{iX}$  is estimated by identifying the closest time point to  $t_i$  among time points  $t$  satisfying the following equation:

$$F_X(t) = X(t_i) \quad \text{and} \quad \text{sign}(F'_X(t)) \neq \text{sign}(F'_X(t_i)).$$

### Regulation-detection function and score

Using the estimated  $t_{iX}$ , we compute the regulation-detection function, e.g.,  $R_{Y \rightarrow X}^{t_{iX}}(t_i)$ , for each time point  $t_i$  as follows:

$$(Y(t_{iX}) - Y(t_i))(\dot{X}(t_{iX}) - \dot{X}(t_i)).$$

If the linear method is chosen,  $Y(t_{iX})$  is linearly interpolated based on the data  $(Y(t_1), \dots, Y(t_n))$ , and  $\dot{X}(t) = (\dot{X}(t_1), \dots, \dot{X}(t_n))$  is estimated using a moving slope filter method. Specifically, after fitting a low-order polynomial regression model to  $X(t) = (X(t_1), X(t_2), \dots, X(t_n))$  in a sliding window (60), the derivative of the polynomial fit is used to estimate  $\dot{X}(t)$  and then  $\dot{X}(t_{iX})$  is linearly interpolated based on the estimated  $\dot{X}(t)$ . The model order and the length of the sliding window parameters can be adjusted (see Supplementary Information). On the other hand, if the fourier method is chosen, both  $\dot{X}(t_i)$  and  $\dot{X}(t_{iX})$  are estimated as  $\dot{F}_X(t_i)$  and  $\dot{F}_X(t_{iX})$ , respectively, and similarly,  $Y(t_i)$  and  $Y(t_{iX})$  are estimated as  $F_Y(t_i)$  and  $F_Y(t_{iX})$ , respectively, where  $F_Y(t)$  is the Fourier series fit to the data  $Y(t)$ . Finally, in both cases, the regulation-detection score Eqn. (4) is estimated using the MATLAB function `trapz`.

### Time-series data

We simulate *in silico* data using the MATLAB function `ode23tb` (Fig. 2). See Supplementary Information for the model equations and parameters. The experimental data sets of the repressilator (Fig. 4A) were obtained from (54). Next, to generate the duplicated experimental repressilator data set (Fig. 4B), we mixed two copies of the repressilator data set from Fig. 4A. We kept one copy at the original phase and, for the second copy, we shifted the phase by 115

minutes (almost half of the period) (Fig. 4B). Then, we removed data on the left and the right where there was only coverage of one of the two data sets. We obtained the estradiol data set from (57, 58) and the Paramecium/Didinium data from (10).

## Discrete and noisy data

To generate discretely sampled data (Fig. 3A), we select a random point in the first period to begin data extraction, and then we uniformly sample two periods worth of data at a sampling rate of 100 points per period. We repeat this process 100 times—every time randomly initializing the starting point in the first period—to generate 100 distinct data sets for every model. Then, we run our algorithm and compute  $F_1$  scores for each of the 100 data sets. Next, from each of the 100 generated data sets, we take every other data point to reduce the number of data points (e.g., 50, 33, 25, . . . , 10 per period).

For the multiplicative noise analysis (Fig. 3B), we begin with two periods worth of data sampled at 100 points per period. Then, we add multiplicative noise sampled randomly from a normal distribution with mean 0 and standard deviation given by the percentage. For example, at 10% multiplicative noise, we add the noise  $X(t_i) \cdot \epsilon$  to  $X(t_i)$ , where  $\epsilon$  is sampled randomly from  $N(0, 0.1^2)$ .

## PCM and GC

We ran the PCM method with an embedding dimension of 3,  $\tau = 1$ , and a max delay of 3, and used a threshold of 0.5684 as recommended in (20) by using the code provided in (20). We ran the GC using the code provided in (61) and specified a max delay of 3 as we did with the PCM method and a significance level of 95%. We rejected the null hypothesis that  $Y$  does not Granger cause  $X$ , and thereby inferred direct regulations if the value of the F-statistic was greater than the critical value from the F-distribution (4).

**Acknowledgments.** We thank Anne Shiu and Seokjoo Chae for valuable comments. This work was supported by a National Institutes of Health Training Grant (T32 HL007622) and Samsung Science and Technology Foundation under Project Number SSTF-BA1902-01 (to J.K.K.).

**Competing Interests.** The authors declare that they have no competing interests.

**Author Contributions.** JT, DF, and JKK designed the research. JT and JKK conceptualized the theoretical approach, performed the research, and developed the computational platform. JT, DF, and JKK wrote the manuscript.

**Competing Interests.** The authors declare that they have no competing interests.

## References

1. M. M. Saint-Antoine, A. Singh, *Current Opinion in Biotechnology* **63**, 89 (2020).  
Nanobiotechnology • Systems Biology.
2. R. Zhang, N. F. Lahens, H. I. Ballance, M. E. Hughes, J. B. Hogenesch, *Proceedings of the National Academy of Sciences* **111**, 16219 (2014).
3. L. S. Mure, *et al.*, *Science* **359** (2018).
4. C. W. J. Granger, *Econometrica* **37**, 424 (1969).
5. P. A. Stokes, P. L. Purdon, *Proceedings of the National Academy of Sciences* **114**, E7063 (2017).
6. H. Lütkepohl, *New Introduction to Multiple Time Series Analysis* (Springer, 2005).
7. A. Pourzanjani, E. D. Herzog, L. R. Petzold, *PLOS ONE* **10**, 1 (2015).

8. J. H. Abel, *et al.*, *Proceedings of the National Academy of Sciences* **113**, 4512 (2016).
9. A. C. Yang, C.-K. Peng, N. E. Huang, *Nature Communications* **9**, 3378 (2018).
10. G. Sugihara, *et al.*, *Science* **338**, 496 (2012).
11. E. R. Deyle, G. Sugihara, *PLOS ONE* **6**, 1 (2011).
12. E. R. Deyle, *et al.*, *Proceedings of the National Academy of Sciences* **110**, 6430 (2013).
13. A. A. Tsonis, *et al.*, *Proceedings of the National Academy of Sciences* **112**, 3253 (2015).
14. H. Ye, E. R. Deyle, L. J. Gilarranz, G. Sugihara, *Scientific Reports* **5**, 14750 (2015).
15. E. R. Deyle, M. C. Maher, R. D. Hernandez, S. Basu, G. Sugihara, *Proceedings of the National Academy of Sciences* **113**, 13081 (2016).
16. H. Ma, *et al.*, *Phys. Rev. E* **96**, 012221 (2017).
17. J. Runge, *et al.*, *Nature Communications* **10**, 2553 (2019).
18. N. Tani, *et al.*, *Scientific Reports* **10**, 650 (2020).
19. J.-Y. Wang, T.-C. Kuo, C.-h. Hsieh, *Nature Communications* **11**, 2635 (2020).
20. S. Leng, *et al.*, *Nature Communications* **11**, 2632 (2020).
21. S. Cobey, E. B. Baskerville, *PLOS ONE* **11**, 1 (2016).
22. P. Mhaskar, M. A. Hjortsø, M. A. Henson, *Biotechnology Progress* **18**, 1010 (2002).
23. E. Balsa-Canto, M. Peifer, J. R. Banga, J. Timmer, C. Fleck, *BMC Systems Biology* **2**, 26 (2008).

24. N. Radde, L. Kaderali, *Discrete Applied Mathematics* **157**, 2285 (2009). Networks in Computational Biology.
25. T. Toni, D. Welch, N. Strelkova, A. Ipsen, M. P. Stumpf, *Journal of The Royal Society Interface* **6**, 187 (2009).
26. N. Geva-Zatorsky, E. Dekel, E. Batchelor, G. Lahav, U. Alon, *Proceedings of the National Academy of Sciences* **107**, 13550 (2010).
27. G. Lillacci, M. Khammash, *PLOS Computational Biology* **6**, 1 (2010).
28. B. Wang, W. Enright, *SIAM Journal on Scientific Computing* **35**, A2718 (2013).
29. M. Stražar, M. Mraz, N. Zimic, M. Moškon, *Natural Computing* **13**, 119 (2014).
30. D. Trejo Banos, A. J. Millar, G. Sanguinetti, *Bioinformatics* **31**, 3617 (2015).
31. T. Gotoh, *et al.*, *Proceedings of the National Academy of Sciences* (2016).
32. D. McBride, L. Petzold, *Journal of Biological Rhythms* **33**, 515 (2018).
33. S. Wang, *et al.*, *Proceedings of the National Academy of Sciences* **115**, 9300 (2018).
34. T. Firman, A. Amgalan, K. Ghosh, *The Journal of Physical Chemistry B* **123**, 343 (2019).
35. J. A. Pitt, J. R. Banga, *BMC Bioinformatics* **20**, 82 (2019).
36. S. Pigolotti, S. Krishna, M. H. Jensen, *Proceedings of the National Academy of Sciences* **104**, 6533 (2007).
37. S. Pigolotti, S. Krishna, M. H. Jensen, *Phys. Rev. Lett.* **102**, 088701 (2009).
38. M. H. Jensen, S. Pigolotti, S. Krishna, *The European Physical Journal Special Topics* **178**, 45 (2009).

39. T. Konopka, M. Rومان, *BMC Systems Biology* **4**, 123 (2010).
40. T. Konopka, *Bioinformatics* **27**, 961 (2011).
41. J. K. Kim, D. B. Forger, *SIAM Journal on Applied Mathematics* **72**, 1842 (2012).
42. S. L. Brunton, J. L. Proctor, J. N. Kutz, *Proceedings of the National Academy of Sciences* **113**, 3932 (2016).
43. N. M. Mangan, S. L. Brunton, J. L. Proctor, J. N. Kutz, *IEEE Transactions on Molecular, Biological and Multi-Scale Communications* **2**, 52 (2016).
44. K. A. McGoff, *et al.*, *Genome Biology* **17**, 214 (2016).
45. H.-H. Jo, *et al.*, *Communications Biology* **1**, 207 (2018).
46. R. FitzHugh, *Biophysical Journal* **1**, 445 (1961).
47. J. Nagumo, S. Arimoto, S. Yoshizawa, *Proceedings of the IRE* **50**, 2061 (1962).
48. B. Veilleux, The analysis of a predatory interaction between didinium and paramecium, Master's thesis, University of Alberta (1976).
49. J. K. Kim, D. B. Forger, *Molecular Systems Biology* **8**, 630 (2012).
50. J. K. Kim, *IET Syst. Biol.* **10**, 125 (2016).
51. O. A. Igoshin, A. Goldbeter, D. Kaiser, G. Oster, *Proceedings of the National Academy of Sciences* **101**, 15760 (2004).
52. B. C. Goodwin, *Advanced Enzyme Regulation* **3**, 425 (1965).
53. M. B. Elowitz, S. Leibler, *Nature* **403**, 335 (2000).



54. L. Potvin-Trottier, N. D. Lord, G. Vinnicombe, J. Paulsson, *Nature* **538**, 514 (2016).
55. H. R. Ueda, *et al.*, *Nature Genetics* **37**, 187 (2005).
56. B. Choi, *et al.*, *Bioinformatics* **36**, 586 (2019).
57. R. Métivier, *et al.*, *Cell* **115**, 751 (2003).
58. V. Lemaire, C. F. Lee, J. Lei, R. Métivier, L. Glass, *Phys. Rev. Lett.* **96**, 198102 (2006).
59. B. Novák, J. J. Tyson, *Nature Reviews Molecular Cell Biology* **9**, 981 (2008).
60. A. V. Oppenheim, R. W. Schaffer, J. R. Buck, *Discrete-time Signal Processing*, Technology and Engineering (Prentice Hall, 1999).
61. Chandler, Granger causality test (2020).

## Supplementary materials

Supplementary Text

Figs. S1 and S2

Tables S1 to S8

References
